# Supplementary material for: Development of Pranoprofen Loaded Nanostructured Lipid Carriers to Improve Its Release and Therapeutic Efficacy in Skin Inflammatory Disorders
Source: PubMed Central journal article supplement (PMC6316124; doi:10.3390/nano8121022), 2018-12-07
Supplement: nanomaterials-08-01022-s001.pdf [file nanomaterials-08-01022-s001.pdf]

## Supplementary materials

**Table S1.** Homogenization assays to select factorial design conditions.

| Parameters tested                   |                |                 |                         |       |         |
|-------------------------------------|----------------|-----------------|-------------------------|-------|---------|
| Number of cycles of the homogenizer |                |                 | 2-3-4                   |       |         |
| Pressure (bar)                      |                |                 | 600-650-700-750-800-850 |       |         |
| Total lipid (%)                     |                |                 | 4-5-6-8                 |       |         |
| Best Results obtained               |                |                 | Results                 |       |         |
| Number of cycles                    | Pressure (bar) | Total lipid (%) | Z-Ave (nm)              | PI    | ZP (mV) |
| 3                                   | 800            | 5               | < 350                   | < 0.3 | < -10   |

**Table S2.** Factors and the corresponding levels in experimental design.

| Factors   | -1.68 | -1    | 0     | +1    | +1.68 |
|-----------|-------|-------|-------|-------|-------|
| cPF (%)   | 0.16  | 0.50  | 1.00  | 1.50  | 1.84  |
| cSL/L (%) | 43.20 | 50.00 | 60.00 | 70.00 | 76.80 |
| cTW (%)   | 2.16  | 2.50  | 3.00  | 3.50  | 3.84  |

**Table S3.** Design of experiments of PF loaded Lipid NLCs.

|     | Independent variables   |      |          |       |         |      | Dependent variables |             |             |            |
|-----|-------------------------|------|----------|-------|---------|------|---------------------|-------------|-------------|------------|
|     | cPF (%)                 |      | cSL/L(%) |       | cTW (%) |      | Z-Ave(nm)±SD        | PI ±SD      | ZP(mV) ±SD  | EE(%)±SD   |
|     | <b>Factorial points</b> |      |          |       |         |      |                     |             |             |            |
| F1  | -1                      | 0.50 | -1       | 50.00 | -1      | 2.50 | 427.70±6.25         | 0.375±0.045 | -9.66± 0.71 | 98.32±0.22 |
| F2  | -1                      | 0.50 | 1        | 70.00 | -1      | 2.50 | 257.90±7.69         | 0.266±0.097 | -10.40±0.36 | 98.46±0.36 |
| F3  | 1                       | 1.50 | -1       | 50.00 | -1      | 2.50 | 248.40±6.34         | 0.229±0.046 | -10.70±0.44 | 99.68±0.17 |
| F4  | 1                       | 1.50 | 1        | 70.00 | -1      | 2.50 | 413.13±5.78         | 0.441±0.078 | -9.03±0.41  | 99.82±0.26 |
| F5  | -1                      | 0.50 | -1       | 50.00 | 1       | 3.50 | 218.57±8.30         | 0.393±0.066 | -10.33±0.29 | 98.68±0.10 |
| F6  | 1                       | 1.50 | -1       | 50.00 | 1       | 3.50 | 294.93±10.58        | 0.260±0.059 | -10.19±0.14 | 97.93±0.28 |
| F7  | -1                      | 0.50 | 1        | 70.00 | 1       | 3.50 | 452.53±5.76         | 0.603±0.069 | -7.88±0.18  | 99.40±0.21 |
| F8  | 1                       | 1.50 | 1        | 70.00 | 1       | 3.50 | 204.57±19.43        | 0.188±0.070 | -8.35±0.36  | 99.80±0.33 |
|     | <b>Axial Points</b>     |      |          |       |         |      |                     |             |             |            |
| F9  | 0                       | 1.00 | 1.68     | 76.80 | 0       | 3.00 | 222.30±9.74         | 0.237±0.085 | -9.20±0.48  | 99.61±0.12 |
| F10 | -1.68                   | 0.16 | 0        | 60.00 | 0       | 3.00 | 392.77±6.89         | 0.435±0.046 | -8.73±0.55  | 99.63±0.11 |
| F11 | 1.68                    | 1.84 | 0        | 60.00 | 0       | 3.00 | 206.20±5.44         | 0.202±0.069 | -11.10±0.20 | 88.79±0.29 |
| F12 | 0                       | 1.00 | -1.68    | 43.20 | 0       | 3.00 | 258.27±16.80        | 0.220±0.157 | -10.90±0.47 | 84.05±0.37 |
| F13 | 0                       | 1.00 | 0        | 60.00 | 1.68    | 3.84 | 239.63±11.67        | 0.265±0.067 | -9.03±0.78  | 99.19±0.34 |
| F14 | 0                       | 1.00 | 0        | 60.00 | -1.68   | 2.16 | 313.47±2.26         | 0.234±0.043 | -9.00±0.37  | 99.31±0.20 |
|     | <b>Center Points</b>    |      |          |       |         |      |                     |             |             |            |
| F15 | 0                       | 1.00 | 0        | 60.00 | 0       | 3.00 | 300.30±14.38        | 0.343±0.024 | -9.30±0.69  | 99.31±0.30 |
| F16 | 0                       | 1.00 | 0        | 60.00 | 0       | 3.00 | 249.83±25.20        | 0.232±0.064 | -8.81±0.57  | 99.23±0.22 |

**Table S4.** Average particle size of optimized formulations determined by laser diffraction (LD).

| Formulation | d(0.1) | d(0.5) | d(0.9) |
|-------------|--------|--------|--------|
| NLCs-F3     | 0.081  | 0.208  | 0.754  |
| NLCs-F3-L   | 0.079  | 0.196  | 0.550  |
| NLCs-F9     | 0.084  | 0.216  | 0.679  |
| NLCs-F9-L   | 0.084  | 0.214  | 0.620  |

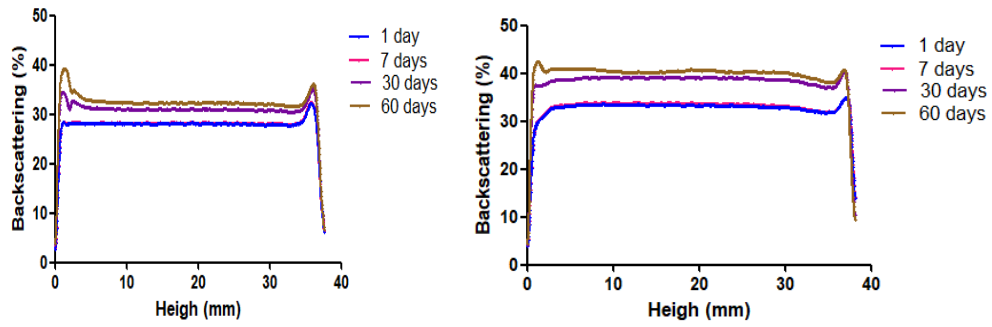

**Figure S1.** NLCs F-3-L and NLCs F-9-L backscattering profiles obtained by the Turbiscan®Lab stored at 25 °C. The left side of the curve corresponds to the bottom of the vial, whereas the right side corresponds to the sample behavior on the top.

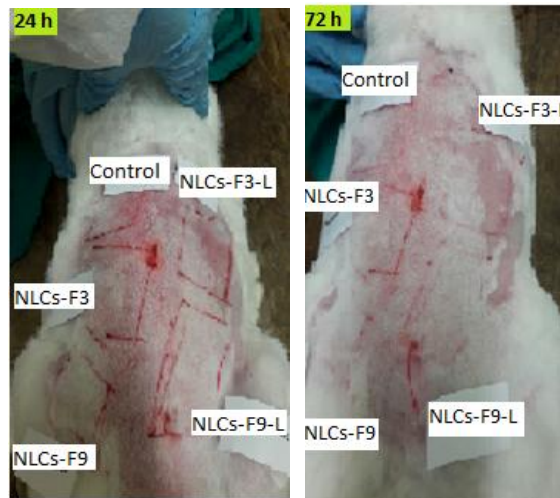

**Figure S2.** Skin irritation testing. Draize test.
